# Supplementary material
Source: HighWire-hosted journal article supplement (https://jitc.bmj.com/content/10/4/e003765)
Supplement: inline-supplementary-material-2 [file inline-supplementary-material-2.xlsx]

## Sheet: Suppl Table S1
Supplementary Table 1. 9 gene sets used in this study
Gene set	Gene
HALLMARK_MITOTIC_SPINDLE	ARHGEF2, CLASP1, KIF11, KIF23, ALS2, ARF6, MYO9B, MYH9, TUBGCP3, CKAP5, RACGAP1, PREX1, ARHGEF3, NUMA1, SPTBN1, KIF2C, KIF5B, TTK, APC, CEP250, PAFAH1B1, CDC42EP2, KIF3B, CCDC88A, KIF15, BIRC5, CNTROB, NF1, TSC1, CDC27, CNTRL, TUBGCP5, KIF4A, MAPRE1, FGD6, BRCA2, PLK1, RASA1, NEK2, WASF1, TOP2A, TRIO, ARHGEF11, KATNB1, PRC1, ANLN, CDK5RAP2, SMC3, TUBGCP2, ESPL1, MAP1S, ARHGAP27, DOCK4, SAC3D1, IN…
HALLMARK_GLYCOLYSIS	PGK1, ALDOA, ENO1, TPI1, PFKP, ERO1A, ALDOB, VEGFA, MXI1, PKM, HK2, LDHA, EXT1, SLC25A10, GUSB, PFKFB1, PGAM1, PYGB, AK4, P4HA1, PMM2, FAM162A, SDC1, EGLN3, PC, B4GALT7, FBP2, IGFBP3, CHPF, B3GAT3, CHST12, HS2ST1, MPI, GNPDA1, AKR1A1, PPFIA4, B3GAT1, CHPF2, G6PD, MDH2, CHST6, PGLS, PGAM2, CHST1, GPC1, TSTA3, ALG1, GFPT1, PRPS1, GOT1, MDH1, SLC35A3, GALK1, EGFR, ANGPTL4, CITED2, PLOD2, QSOX1, ME2,…
Tcells	AMICA1, APBB1IP, ARHGAP15, ARHGAP25, ARHGAP9, BIN2, BTK, C1orf162, CCL19, CCR7, CD2, CD27, CD28, CD3D, CD3E, CD3G, CD48, CD52, CD6, CD8A, CD96, CORO1A, CRTAM, CXCL9, CXCR6, CYTIP, DOCK10, DOCK2, DOCK8, DPEP2, EVI2A, EVI2B, FAM26F, FLI1, FYB, FYN, GAB3, GIMAP2, GIMAP4, GIMAP5, GIMAP6, GIMAP7, GMFG, GPR171, GPR18, GZMK, HCST, HMHA1, HVCN1, ICOS, IL10RA, IL16, IL23A, IL7R, ITGAL, ITK, KLHL6, KLRB1, …
Bcells	AFF3,BANK1,BLK,BTLA,CCR6,CD180,CD19,CD22,CD37,CD72,CD79A,CD79B,CR2,EBF1,FAM129C,FCRL1,FCRL2,FCRL3,FCRL5,FCRLA,HLA-DOB,IGHV5-78,KIAA0125,LINC00926,LOC100507616, LY9,MS4A1,P2RX5,PAX5,PNOC,POU2F2,S1PR4,SNX22,STAP1,TCL1A,TLR10,VPREB3
GO_MHC_PROTEIN_COMPLEX	B2M, CD74, HLA-A, HLA-B, HLA-C, HLA-DMA, HLA-DMB, HLA-DOA, HLA-DOB, HLA-DPA1, HLA-DPB1, HLA-DQA1, HLA-DQA2, HLA-DQB1, HLA-DQB2, HLA-DRA, HLA-DRB1, HLA-DRB3, HLA-DRB4, HLA-DRB5, HLA-E, HLA-F, HLA-G, HLA-H, MR1
GO_NEGATIVE_REGULATION_OF_CYTOKINE_PRODUCTION_INVOLVED_ IN_INFLAMMATORY_RESPONSE	ABCD1, ABCD2, ADCY7, APOD, APPL2, CHID1, CUEDC2, F2, IL1R2, MACIR, MEFV, MIR125A, MIR129-1, MIR129-2, MIR135A1, MIR136,MIR140, MIR146A, MIR16-1, MIR16-2, MIR203A, MIR221, MIR222, MIR26A1, MIR26A2, MIR338, MIR378A, MIR93, MIR98, NLRC3, NLRP7, PDCD4, PYCARD, SIRPA, ZC3H12A
HALLMARK_ANGIOGENESIS	APOH, APP, CCND2, COL3A1, COL5A2, CXCL6, FGFR1, FSTL1, ITGAV, JAG1, JAG2, KCNJ8, LPL, LRPAP1, LUM, MSX1, NRP1, OLR1, PDGFA, PF4, PGLYRP1, POSTN, PRG2, PTK2, S100A4, SERPINA5, SLCO2A1, SPP1, STC1, THBD, TIMP1, TNFRSF21, VAV2, VCAN, VEGFA, VTN
HALLMARK_HYPOXIA	ACKR3, ADM, ADORA2B, AK4, AKAP12, ALDOA, ALDOB, ALDOC, AMPD3, ANGPTL4, ANKZF1, ANXA2, ATF3, ATP7A, B3GALT6, B4GALNT2, BCAN, BCL2, BGN, BHLHE40, BNIP3L, BRS3, BTG1, CA12, CASP6, CAV1, CAVIN1, CAVIN3, CCN1, CCN2, CCN5, CCNG2, CDKN1A, CDKN1B, CDKN1C, CHST2, CHST3, CITED2, COL5A1, CP, CSRP2, CXCR4, DCN, DDIT3, DDIT4, DPYSL4, DTNA, DUSP1, EDN2, EFNA1, EFNA3, EGFR, ENO1, ENO2, ENO3, ERO1A, ERRFI1, ETS1…
HALLMARK_EMT	ABI3BP, ACTA2, ADAM12, ANPEP, APLP1, AREG, BASP1, BDNF, BGN, BMP1, CADM1, CALD1, CALU, CAP2, CAPG, CCN1, CCN2, CD44, CD59, CDH11, CDH2, CDH6, COL11A1, COL12A1, COL16A1, COL1A1, COL1A2, COL3A1, COL4A1, COL4A2, COL5A1, COL5A2, COL5A3, COL6A2, COL6A3, COL7A1, COL8A2, COLGALT1, COMP, COPA, CRLF1, CTHRC1, CXCL1, CXCL12, CXCL6, CXCL8, DAB2, DCN, DKK1, DPYSL3, DST, ECM1, ECM2, EDIL3, EFEMP2, ELN, EMP3, …

## Sheet: Suppl Table S2
Supplementary Table 2. TIME scoring of 113 lung cancer patients
ID	ssGSEA_ score_ HALLMARK_MITOTIC_ SPINDLE	ssGSEA_ score_ HALLMARK_GLYCOLYSIS	ssGSEA_ score_ Tcells	ssGSEA_ score_ Bcells	ssGSEA_ score_ GO_MHC_ PROTEIN_ COMPLEX	ssGSEA_ score_ GO_NEGATIVE_REGULATION_CYTOKINE	ssGSEA_ score_ HALLMARK_ANGIOGENESIS	ssGSEA_ score_ HALLMARK_HYPOXIA	ssGSEA_ score_ HALLMARK_EMT	Z_score_ HALLMARK_MITOTIC_ SPINDLE	Z_score_ HALLMARK_GLYCOLYSIS	Z_score_ Tcells	Z_score_ Bcells	Z_score_ GO_MHC_ PROTEIN_ COMPLEX	Z_score_ GO_NEGATIVE_REGULATION_CYTOKINE	Z_score_ HALLMARK_ANGIOGENESIS	Z_score_ HALLMARK_HYPOXIA	Z_score_ HALLMARK_EMT	T-score	I-score	S-score	category of T-score	category of I-score	category of S-score	TIME
LK4	0.646372	0.661923	0.5497	0.31853	0.998838	0.500059	0.636249	0.653077	0.685476	1.12258	0.521478	-0.0488208	0.503437	1.59009	-0.196109	0.270728	-0.356745	0.0212009	0.822028	0.68157	-0.0652313	high	high	low	Group8
LK8	0.655635	0.666693	0.452796	0.0953195	0.904948	0.44552	0.679219	0.646455	0.790904	1.38548	0.691076	-0.937095	-1.19086	-0.792965	-1.41872	1.14981	-0.587737	1.6855	1.03828	-0.97364	0.207213	high	low	high	Group5
LK18	0.599567	0.651074	0.636366	0.317704	0.982543	0.524573	0.586702	0.645494	0.661032	-0.205797	0.135779	0.745607	0.497164	1.1765	0.353425	-0.742906	-0.621259	-0.364676	-0.0350092	0.806425	-0.343854	high	high	low	Group8
LK25	0.608256	0.614614	0.823294	0.613409	0.982823	0.586415	0.628104	0.680975	0.704235	0.0407961	-1.16047	2.45909	2.74173	1.18362	1.73975	0.104099	0.616259	0.317329	-0.559839	2.12815	0.69436	low	high	high	Group3
LK26	0.583219	0.61928	0.67701	0.226559	0.953676	0.519288	0.60817	0.629211	0.636174	-0.669798	-0.994581	1.11818	-0.194673	0.443812	0.234949	-0.303711	-1.18917	-0.757089	-0.832189	0.455772	-0.503755	low	high	low	Group4
LK29	0.593119	0.627392	0.513106	0.151471	0.960848	0.480572	0.584666	0.616479	0.595527	-0.388796	-0.706175	-0.384259	-0.764641	0.625852	-0.632941	-0.784564	-1.63322	-1.39876	-0.547486	-0.174349	-1.11237	low	low	low	Group2
LK30	0.595583	0.609742	0.654592	0.334518	0.959987	0.511755	0.595877	0.640823	0.634076	-0.318875	-1.33369	0.912676	0.624797	0.604015	0.0660873	-0.555203	-0.784145	-0.790219	-0.826283	0.713829	-0.51587	low	high	low	Group4
LK31	0.59322	0.577649	0.694062	0.244414	0.962633	0.517573	0.644951	0.657444	0.688779	-0.385939	-2.47468	1.27448	-0.059147	0.671175	0.196518	0.448749	-0.20446	0.0733394	-1.43031	0.628837	0.128537	low	high	high	Group3
LK33	0.568455	0.645628	0.61484	0.403463	0.977544	0.515015	0.627588	0.676792	0.726233	-1.08881	-0.0578672	0.548288	1.14812	1.04962	0.139176	0.0935392	0.470378	0.664593	-0.573339	0.915345	0.341921	low	high	high	Group3
LK36	0.609953	0.662274	0.647569	0.299059	0.956724	0.55478	0.708476	0.711126	0.813042	0.0889531	0.533944	0.848301	0.355642	0.521179	1.03058	1.74835	1.6679	2.03497	0.311449	0.575041	1.62045	high	high	high	Group7
LK37	0.579227	0.611289	0.487762	0.190074	0.999193	0.494446	0.535851	0.587503	0.586731	-0.783092	-1.27869	-0.616579	-0.471615	1.59911	-0.321929	-1.78322	-2.64386	-1.5376	-1.03089	0.170305	-1.57165	low	high	low	Group4
LK38	0.596229	0.593036	0.480421	0.122749	0.938078	0.481457	0.669845	0.675912	0.715621	-0.300544	-1.92763	-0.683875	-0.98265	0.047924	-0.613107	0.95803	0.439692	0.497067	-1.11409	-0.539534	0.320421	low	low	high	Group1
LK39	0.617203	0.639947	0.526342	0.307625	0.943705	0.512489	0.686992	0.693312	0.749687	0.294717	-0.259828	-0.262934	0.420661	0.190755	0.0825396	1.30882	1.04657	1.03484	0.0174447	0.116161	0.868189	high	high	high	Group7
LK41	0.588116	0.626129	0.534365	0.156212	0.944118	0.497909	0.70832	0.704272	0.77297	-0.530815	-0.751088	-0.189387	-0.728651	0.201237	-0.244288	1.74514	1.42881	1.40238	-0.640951	-0.238934	1.08301	low	low	high	Group1
LK43	0.622013	0.605856	0.808838	0.690743	0.974623	0.557262	0.613574	0.66753	0.676791	0.431234	-1.47184	2.32658	3.32875	0.975488	1.08623	-0.193165	0.14734	-0.115912	-0.520303	2.21027	0.231123	low	high	high	Group3
LK47	0.63707	0.673579	0.499326	0.243033	0.880036	0.477121	0.691633	0.697284	0.816792	0.858579	0.935859	-0.51058	-0.0696263	-1.42525	-0.710313	1.40377	1.1851	2.09417	0.897219	-0.668484	0.993182	high	low	high	Group5
LK49	0.611206	0.627791	0.638538	0.382202	0.898826	0.531678	0.710469	0.703706	0.782675	0.124519	-0.692008	0.765521	0.986746	-0.948351	0.512712	1.78912	1.4091	1.5556	-0.283744	0.267972	1.31663	low	high	high	Group3
LK51	0.638901	0.660738	0.610259	0.274173	0.952195	0.52105	0.708885	0.70314	0.774746	0.910538	0.479361	0.506292	0.166738	0.406233	0.274465	1.7567	1.38934	1.43043	0.694949	0.359754	1.21273	high	high	high	Group7
LK54	0.616951	0.652532	0.672787	0.306124	0.956558	0.55506	0.648594	0.675374	0.696551	0.287588	0.187594	1.07946	0.409268	0.516961	1.03686	0.523269	0.420913	0.196031	0.237591	0.668563	0.544269	high	high	high	Group7
LK55	0.62076	0.67111	0.5146	0.175125	0.940343	0.502269	0.576951	0.64297	0.613514	0.395685	0.848105	-0.370571	-0.585091	0.105414	-0.146556	-0.942393	-0.709281	-1.11481	0.621895	-0.283416	-0.728261	high	low	low	Group6
LK57	0.662876	0.643738	0.430362	0.175337	0.891611	0.402243	0.541443	0.633061	0.623344	1.591	-0.125059	-1.14274	-0.583481	-1.13146	-2.38885	-1.66881	-1.05489	-0.959634	0.732972	-0.95256	-1.51805	high	low	low	Group6
LK58	0.583649	0.622406	0.468732	0.123205	0.900374	0.476298	0.638722	0.655814	0.682648	-0.65759	-0.883464	-0.791025	-0.979192	-0.909043	-0.728759	0.321324	-0.261318	-0.0234532	-0.770527	-0.893087	-0.173052	low	low	low	Group2
LK59	0.604554	0.692795	0.398038	0.255411	0.895933	0.533167	0.615303	0.676028	0.691747	-0.0642656	1.61905	-1.43904	0.0243293	-1.02178	0.546078	-0.15779	0.443725	0.120182	0.777391	-0.812164	0.238049	high	low	high	Group5
LK62	0.696475	0.664371	0.28085	0.0140599	0.785441	0.335831	0.532742	0.612245	0.512163	2.54458	0.608523	-2.51325	-1.80767	-3.82621	-3.87762	-1.84683	-1.78091	-2.71475	1.57655	-2.71571	-2.55503	high	low	low	Group6
LK64	0.623073	0.631542	0.748056	0.554732	0.980383	0.530686	0.642389	0.682033	0.718067	0.461338	-0.558644	1.76942	2.29634	1.12168	0.490472	0.396326	0.653178	0.535674	-0.0486527	1.72915	0.518912	high	high	high	Group7
LK65	0.544682	0.636109	0.562097	0.234657	0.965364	0.509128	0.642882	0.685862	0.689242	-1.76353	-0.396272	0.0648133	-0.13321	0.740487	0.00720019	0.406429	0.786716	0.0806381	-1.0799	0.22403	0.320246	low	high	high	Group3
LK67	0.601605	0.631794	0.586131	0.296326	1	0.494672	0.582531	0.633369	0.603295	-0.147979	-0.549685	0.285129	0.334894	1.61959	-0.316858	-0.82825	-1.04414	-1.27612	-0.348832	0.746537	-0.866342	low	high	low	Group4
LK68	0.589482	0.646271	0.545674	0.215417	0.961954	0.494432	0.58994	0.64216	0.638031	-0.492041	-0.034986	-0.0857288	-0.279249	0.653918	-0.322236	-0.676669	-0.737542	-0.727776	-0.263514	0.0963133	-0.616056	low	high	low	Group4
LK69	0.667755	0.6566	0.462123	0.25233	0.867086	0.495012	0.601063	0.674684	0.670125	1.72948	0.332231	-0.8516	0.000938145	-1.75395	-0.30924	-0.449111	0.39686	-0.221142	1.03085	-0.868205	-0.145658	high	low	low	Group6
LK74	0.680788	0.653738	0.237424	0	0.84662	0.474109	0.527052	0.611092	0.564635	2.09936	0.230468	-2.91132	-1.91439	-2.27341	-0.777821	-1.96324	-1.82114	-1.88642	1.16491	-2.36637	-1.61216	high	low	low	Group6
LK77	0.667	0.672285	0.407423	0.128646	0.904371	0.457609	0.618994	0.68609	0.663322	1.70804	0.889859	-1.35301	-0.937893	-0.807603	-1.1477	-0.0822864	0.794679	-0.328538	1.29895	-1.03283	-0.190961	high	low	low	Group6
LK79	0.587704	0.630376	0.596696	0.219655	0.960891	0.526656	0.619776	0.656106	0.705076	-0.542502	-0.600098	0.381973	-0.247081	0.626943	0.400129	-0.0662781	-0.251104	0.330607	-0.5713	0.253945	0.103338	low	high	low	Group4
LK82	0.577367	0.596318	0.672694	0.380223	0.953047	0.606141	0.645917	0.650411	0.70036	-0.835863	-1.81094	1.07861	0.971723	0.427846	2.18195	0.4685	-0.449765	0.256149	-1.3234	0.826059	0.614208	low	high	high	Group3
LK84	0.637518	0.662132	0.666588	0.374847	0.987773	0.553785	0.682001	0.684603	0.754386	0.871289	0.528921	1.02264	0.930912	1.30925	1.00828	1.20672	0.7428	1.10902	0.700105	1.0876	1.01671	high	high	high	Group7
LK85	0.588664	0.618909	0.43862	0.130162	0.972593	0.47003	0.575529	0.624305	0.633432	-0.515254	-1.00779	-1.06704	-0.926385	0.923951	-0.869269	-0.971494	-1.36029	-0.800372	-0.761523	-0.356493	-1.00036	low	low	low	Group2
LK86	0.59316	0.595533	0.57445	0.191081	0.902795	0.508493	0.640237	0.649724	0.682337	-0.387651	-1.83884	0.17805	-0.463972	-0.847602	-0.00704317	0.352305	-0.473707	-0.0283633	-1.11325	-0.377841	-0.0392021	low	low	low	Group2
LK87	0.584424	0.629224	0.554158	0.124768	0.956473	0.501515	0.667284	0.676777	0.73744	-0.635585	-0.641038	-0.00795796	-0.967328	0.514813	-0.163471	0.90564	0.46986	0.841508	-0.638312	-0.153491	0.513384	low	low	high	Group1
LK88	0.6083	0.610179	0.586356	0.303994	0.951336	0.48671	0.675227	0.675085	0.724326	0.0420493	-1.31816	0.287187	0.393097	0.384422	-0.495341	1.06814	0.410826	0.634486	-0.638055	0.354902	0.404527	low	high	high	Group3
LK91	0.607016	0.616577	0.757962	0.484174	0.977376	0.553462	0.683174	0.694242	0.779941	0.0056095	-1.09069	1.86022	1.76077	1.04535	1.00105	1.23072	1.07901	1.51244	-0.54254	1.55545	1.2058	low	high	high	Group3
LK92	0.664998	0.679978	0.551021	0.183777	0.935932	0.504354	0.612826	0.678795	0.669944	1.65122	1.16339	-0.0367159	-0.51942	-0.00653334	-0.0998122	-0.208472	0.540239	-0.224002	1.40731	-0.187556	0.0019883	high	low	low	Group6
LK93	0.644538	0.659887	0.627188	0.442244	0.94951	0.529371	0.634595	0.683423	0.751667	1.07054	0.449089	0.661473	1.4425	0.338088	0.460981	0.236878	0.70164	1.0661	0.759815	0.81402	0.6164	high	high	high	Group7
LK94	0.592229	0.6036	0.63244	0.269277	0.940085	0.538428	0.676832	0.674372	0.729874	-0.414067	-1.55204	0.709616	0.129577	0.0988727	0.664031	1.10097	0.385967	0.72206	-0.983053	0.312689	0.718258	low	high	high	Group3
LK95	0.632507	0.601078	0.592714	0.198259	0.950579	0.52609	0.704624	0.694422	0.764642	0.729073	-1.64171	0.345464	-0.409488	0.365204	0.387434	1.66954	1.08529	1.27093	-0.456318	0.100394	1.1033	low	high	high	Group3
LK97	0.670379	0.679078	0.584164	0.217902	0.969472	0.530016	0.681685	0.692177	0.753976	1.80394	1.13136	0.267094	-0.260391	0.844743	0.475451	1.20025	1.00696	1.10254	1.46765	0.283815	0.946301	high	high	high	Group7
LK101	0.599497	0.635713	0.638817	0.131875	0.916782	0.538608	0.657931	0.672573	0.707727	-0.207782	-0.410352	0.768071	-0.913384	-0.492604	0.668058	0.714288	0.323216	0.372448	-0.309067	-0.212639	0.519502	low	low	high	Group1
LK102	0.594105	0.60647	0.573316	0.193525	0.937273	0.478008	0.614684	0.622116	0.621886	-0.360839	-1.45001	0.167656	-0.44542	0.0274934	-0.690427	-0.170464	-1.43661	-0.982653	-0.905424	-0.0834236	-0.820038	low	low	low	Group2
Ichi1	0.626383	0.66743	0.441489	0.122786	0.934299	0.480187	0.663002	0.663562	0.782046	0.555271	0.717268	-1.04075	-0.982374	-0.0480023	-0.641563	0.818033	0.00895042	1.54567	0.636269	-0.690375	0.432772	high	low	high	Group5
Ichi2	0.647902	0.655436	0.671953	0.277986	0.971521	0.512013	0.635431	0.653129	0.736463	1.166	0.29086	1.07182	0.195681	0.896743	0.0718761	0.253991	-0.354954	0.826074	0.728431	0.721415	0.199247	high	high	high	Group7
Ichi4	0.601568	0.655735	0.457262	0.134864	0.971699	0.474066	0.618157	0.658108	0.684303	-0.149015	0.301486	-0.896165	-0.890693	0.901276	-0.778789	-0.0994132	-0.181297	0.00266983	0.0762355	-0.295194	-0.264207	high	low	low	Group6
Ichi5	0.591711	0.631367	0.543746	0.137573	0.89365	0.450054	0.646622	0.670089	0.722186	-0.428759	-0.564881	-0.103398	-0.870128	-1.07971	-1.31708	0.482934	0.236574	0.600708	-0.49682	-0.684411	0.000784882	low	low	low	Group2
Ichi6	0.613395	0.675086	0.385725	0.133416	0.906552	0.492298	0.55764	0.677403	0.649571	0.186644	0.989442	-1.55191	-0.901685	-0.75224	-0.370072	-1.33746	0.491679	-0.5456	0.588043	-1.06861	-0.440364	high	low	low	Group6
Ichi7	0.589347	0.612095	0.420193	0.0586797	0.902524	0.415922	0.571519	0.612613	0.636499	-0.495866	-1.25003	-1.23596	-1.46898	-0.854472	-2.08222	-1.05353	-1.76807	-0.751963	-0.872948	-1.18647	-1.41395	low	low	low	Group2
Ichi8	0.684338	0.676133	0.412761	0.0704386	0.875393	0.422382	0.583579	0.664047	0.619114	2.20011	1.02669	-1.30409	-1.37972	-1.54309	-1.93739	-0.806809	0.0258523	-1.0264	1.6134	-1.40897	-0.936187	high	low	low	Group6
Ichi9	0.683641	0.649179	0.510147	0.133129	0.881931	0.403977	0.582061	0.637437	0.643174	2.18033	0.0684014	-0.411386	-0.90386	-1.37717	-2.34999	-0.837854	-0.902269	-0.646596	1.12436	-0.897473	-1.18418	high	low	low	Group6
Ichi10	0.648717	0.669996	0.604538	0.409885	0.936114	0.491242	0.62789	0.655461	0.712366	1.18915	0.808486	0.453856	1.19688	-0.00191265	-0.393753	0.099722	-0.273611	0.445691	0.998819	0.549606	-0.0304876	high	high	low	Group8
Ichi11	0.640839	0.664261	0.674372	0.230495	0.952286	0.565608	0.623062	0.665009	0.704268	0.965567	0.604594	1.09399	-0.164797	0.408548	1.27333	0.000943799	0.0594182	0.317851	0.78508	0.445915	0.412884	high	high	high	Group7
Ichi12	0.637335	0.679829	0.445063	0.118313	0.907467	0.48557	0.624279	0.72001	0.712843	0.866116	1.15806	-1.00798	-1.01632	-0.729036	-0.520904	0.0258377	1.97775	0.453218	1.01209	-0.91778	0.483975	high	low	high	Group5
Ichi13	0.637657	0.682658	0.453542	0.234631	0.916077	0.460542	0.652171	0.715336	0.729731	0.875251	1.25864	-0.930258	-0.133407	-0.510497	-1.08195	0.596463	1.81473	0.719808	1.06695	-0.524721	0.512264	high	low	high	Group5
Msogo1	0.599585	0.661039	0.46009	0.268748	0.988513	0.498467	0.551478	0.620488	0.607667	-0.205295	0.490057	-0.870235	0.125561	1.32804	-0.231783	-1.46354	-1.49342	-1.20711	0.142381	0.194454	-1.09896	high	high	low	Group8
Msogo2	0.596319	0.622965	0.789419	0.608964	0.9789	0.56856	0.658006	0.679717	0.731047	-0.297993	-0.863563	2.14857	2.708	1.08405	1.3395	0.715818	0.572401	0.74058	-0.580778	1.98021	0.842074	low	high	high	Group3
Msogo3	0.622594	0.61243	0.597921	0.196966	0.889068	0.499417	0.653768	0.672465	0.691494	0.447722	-1.23811	0.3932	-0.419308	-1.19603	-0.210501	0.629116	0.31946	0.116202	-0.395196	-0.407378	0.213569	low	low	high	Group1
Msogo4	0.609876	0.647766	0.626867	0.228765	0.975859	0.512333	0.619068	0.649607	0.689941	0.0867808	0.0181614	0.658537	-0.17793	1.00686	0.0790537	-0.0807645	-0.477788	0.0916751	0.0524711	0.495823	-0.096956	high	high	low	Group8
Msogo5	0.585153	0.634273	0.499983	0.0841586	0.924733	0.508797	0.666259	0.676234	0.717464	-0.614889	-0.461551	-0.504553	-1.27558	-0.290791	-0.000216021	0.884674	0.450913	0.526163	-0.53822	-0.690307	0.465384	low	low	high	Group1
Msogo6	0.514009	0.655563	0.489517	0.176375	0.941138	0.443664	0.559759	0.611589	0.576776	-2.63405	0.295374	-0.600492	-0.575601	0.125597	-1.46032	-1.29411	-1.80379	-1.69475	-1.16934	-0.350165	-1.56324	low	low	low	Group2
Msogo8	0.666258	0.664	0.397674	0.135696	0.879018	0.416423	0.627244	0.679409	0.657974	1.68697	0.59531	-1.44238	-0.884379	-1.4511	-2.07099	0.0865051	0.561649	-0.412959	1.14114	-1.25929	-0.458947	high	low	low	Group6
Msogo9	0.627219	0.623891	0.651335	0.396112	0.950138	0.509545	0.557522	0.595222	0.581696	0.579009	-0.830638	0.882825	1.09233	0.354017	0.0165426	-1.33987	-2.37465	-1.61709	-0.125814	0.77639	-1.32877	low	high	low	Group4
LK107	0.574721	0.644439	0.54233	0.295797	0.945183	0.51891	0.595349	0.661166	0.664686	-0.91096	-0.100118	-0.116382	0.330882	0.22825	0.226476	-0.566016	-0.0746197	-0.306995	-0.505539	0.147583	-0.180289	low	high	low	Group4
LK109	0.633086	0.628635	0.356567	0.102691	0.835388	0.497283	0.530451	0.609632	0.552983	0.745508	-0.662002	-1.81919	-1.1349	-2.55848	-0.258333	-1.89369	-1.87205	-2.07036	0.0417531	-1.83753	-1.52361	high	low	low	Group6
LK110	0.577994	0.624106	0.666979	0.333799	0.942867	0.5897	0.701162	0.69618	0.785667	-0.818074	-0.823025	1.02622	0.619336	0.169466	1.8134	1.59871	1.14659	1.60282	-0.820549	0.605007	1.54038	low	high	high	Group3
LK111	0.601657	0.651051	0.715866	0.682804	0.971174	0.555424	0.651093	0.684456	0.723735	-0.146475	0.134946	1.47435	3.26848	0.88795	1.04503	0.574404	0.737692	0.625157	-0.00576429	1.87693	0.745571	high	high	high	Group7
LK112	0.580958	0.62539	0.56041	0.281008	0.918503	0.529958	0.592901	0.652403	0.655449	-0.733958	-0.777357	0.0493483	0.218621	-0.448906	0.47415	-0.616104	-0.380264	-0.452813	-0.755657	-0.0603121	-0.243758	low	low	low	Group2
LK113	0.591841	0.617379	0.539203	0.211576	0.926424	0.539217	0.64953	0.673147	0.692491	-0.425083	-1.06218	-0.145041	-0.308404	-0.247866	0.681715	0.54242	0.343248	0.131938	-0.743632	-0.23377	0.42483	low	low	high	Group1
LK116	0.57387	0.59418	0.551552	0.103018	0.948507	0.545987	0.606775	0.643754	0.644744	-0.935126	-1.88695	-0.031844	-1.13242	0.312633	0.833485	-0.33225	-0.681929	-0.621806	-1.41104	-0.283878	-0.200625	low	low	low	Group2
LK117	0.595331	0.633537	0.735672	0.31903	0.918709	0.535735	0.621501	0.669771	0.701294	-0.326031	-0.48772	1.65591	0.507235	-0.443694	0.603664	-0.0309958	0.225504	0.2709	-0.406875	0.573149	0.267268	low	high	high	Group3
LK118	0.590553	0.616284	0.536421	0.169326	0.915306	0.504167	0.670106	0.686924	0.754018	-0.461641	-1.10109	-0.170548	-0.629108	-0.530057	-0.104012	0.963379	0.823744	1.1032	-0.781367	-0.443238	0.696579	low	low	high	Group1
LK121	0.613401	0.65569	0.706755	0.340421	0.886151	0.55987	0.652593	0.677684	0.710113	0.186826	0.299886	1.39084	0.669604	-1.27005	1.14469	0.605082	0.501502	0.410123	0.243356	0.263463	0.665349	high	high	high	Group7
LK122	0.593984	0.625571	0.580249	0.258833	0.902758	0.574143	0.688967	0.696753	0.73335	-0.364268	-0.770941	0.231203	0.0503012	-0.848537	1.46466	1.34923	1.16657	0.776941	-0.567604	-0.189011	1.18935	low	low	high	Group1
LK123	0.569645	0.636868	0.606047	0.309256	0.947598	0.521476	0.669485	0.700522	0.753064	-1.05504	-0.369296	0.467685	0.433045	0.289548	0.284012	0.950667	1.29803	1.08816	-0.712168	0.396759	0.905216	low	high	high	Group3
LK124	0.581177	0.628747	0.734862	0.520851	0.962078	0.541901	0.663931	0.673425	0.755697	-0.727736	-0.658011	1.64848	2.03917	0.657086	0.741874	0.837045	0.352922	1.12972	-0.692873	1.44824	0.76539	low	high	high	Group3
LK126	0.655818	0.670981	0.430935	0.315596	0.909524	0.55349	0.611455	0.68678	0.707279	1.39069	0.843521	-1.13749	0.481164	-0.67682	1.00167	-0.236514	0.818726	0.365387	1.1171	-0.44438	0.487317	high	low	high	Group5
LK127	0.563423	0.628666	0.533079	0.272306	0.955776	0.505301	0.608873	0.632759	0.686643	-1.23162	-0.660889	-0.201182	0.152569	0.497132	-0.0785894	-0.289329	-1.06541	0.0396246	-0.946254	0.149506	-0.348425	low	high	low	Group4
LK132	0.657926	0.696367	0.454299	0.255505	0.866569	0.483495	0.608415	0.655404	0.646504	1.4505	1.74604	-0.923318	0.025039	-1.76707	-0.567417	-0.298699	-0.275594	-0.594016	1.59827	-0.88845	-0.433931	high	low	low	Group6
LK135	0.616938	0.694011	0.434196	0.202239	0.966084	0.530339	0.659861	0.674292	0.700167	0.287217	1.66229	-1.1076	-0.379278	0.758756	0.4827	0.753785	0.383191	0.253102	0.974752	-0.242706	0.468194	high	low	high	Group5
LK136	0.623566	0.682793	0.666634	0.188428	0.905269	0.526465	0.6917	0.684152	0.760831	0.475306	1.26346	1.02306	-0.484115	-0.784813	0.395837	1.40514	0.727086	1.21075	0.869385	-0.0819554	0.934703	high	low	high	Group5
LK138	0.566891	0.634825	0.609476	0.407013	0.991738	0.517067	0.587205	0.623321	0.658812	-1.13321	-0.44192	0.499116	1.17507	1.40989	0.185176	-0.732621	-1.3946	-0.399733	-0.787564	1.02802	-0.585443	low	high	low	Group4
LK139	0.565044	0.663502	0.5096	0.142795	0.948586	0.563439	0.675287	0.706943	0.752099	-1.18562	0.577594	-0.416397	-0.830494	0.314622	1.22471	1.06935	1.52199	1.07292	-0.304011	-0.310756	1.22224	low	low	high	Group1
LK141	0.544367	0.653889	0.55987	0.345419	0.96388	0.529974	0.594905	0.656958	0.630384	-1.77248	0.235862	0.0444044	0.707536	0.702815	0.474499	-0.575105	-0.221402	-0.848494	-0.768307	0.484918	-0.292626	low	high	low	Group4
LK143	0.576269	0.667086	0.561276	0.33124	0.904454	0.579016	0.58528	0.640302	0.623035	-0.867034	0.705033	0.0572939	0.59991	-0.805492	1.5739	-0.77201	-0.802318	-0.964502	-0.0810007	-0.0494294	-0.241233	high	low	low	Group6
LK147	0.620077	0.684209	0.485154	0.264346	0.930441	0.428471	0.604088	0.666183	0.672577	0.376303	1.3138	-0.640491	0.0921451	-0.145909	-1.80089	-0.387223	0.100344	-0.182431	0.845054	-0.231418	-0.567551	high	low	low	Group6
LK148	0.626038	0.641658	0.431239	0.199478	0.847204	0.513239	0.538173	0.618295	0.570491	0.54549	-0.199002	-1.1347	-0.400237	-2.25857	0.0993632	-1.73572	-1.56988	-1.79397	0.173244	-1.2645	-1.25005	high	low	low	Group6
LK152	0.632657	0.596767	0.630282	0.353334	0.884693	0.435693	0.573825	0.644517	0.653958	0.73333	-1.79499	0.689836	0.76762	-1.30707	-1.63901	-1.00635	-0.655309	-0.476359	-0.530832	0.0501288	-0.944257	low	high	low	Group4
LK155	0.551397	0.647059	0.455011	0.157985	0.936034	0.502176	0.52564	0.602908	0.560143	-1.57293	-0.00698338	-0.916791	-0.715193	-0.00396434	-0.148643	-1.99213	-2.10655	-1.95733	-0.789958	-0.545316	-1.55116	low	low	low	Group2
LK156	0.556054	0.662589	0.535365	0.17981	0.98319	0.552627	0.570376	0.65878	0.601661	-1.44077	0.545162	-0.180223	-0.549526	1.19293	0.98233	-1.07691	-0.157839	-1.30193	-0.447802	0.154394	-0.388587	low	high	low	Group4
LK157	0.561882	0.675026	0.488888	0.141096	0.968418	0.475047	0.540458	0.651672	0.585248	-1.27537	0.987313	-0.606258	-0.843391	0.817991	-0.756786	-1.68897	-0.405778	-1.56101	-0.14403	-0.210553	-1.10314	low	low	low	Group2
LK160	0.589711	0.66783	0.640663	0.390693	0.953345	0.526706	0.642569	0.684865	0.719244	-0.485532	0.731489	0.784995	1.05119	0.435411	0.401249	0.400023	0.75193	0.554262	0.122979	0.757199	0.526866	high	high	high	Group7
LK161	0.671444	0.681941	0.513027	0.163054	0.903527	0.440193	0.57746	0.681682	0.717846	1.83417	1.23315	-0.384984	-0.676717	-0.829033	-1.53813	-0.931992	0.640934	0.532198	1.53366	-0.630245	-0.324247	high	low	low	Group6
LK165	0.587667	0.655574	0.603481	0.227457	0.950112	0.516587	0.587683	0.663187	0.662197	-0.543537	0.295747	0.444164	-0.187862	0.353372	0.174414	-0.722854	-0.00412663	-0.346287	-0.123895	0.203225	-0.224714	high	high	low	Group8
LK166	0.593639	0.692016	0.295699	0.0377759	0.902976	0.414341	0.533575	0.650944	0.585657	-0.374046	1.59134	-2.37714	-1.62765	-0.843008	-2.11766	-1.82979	-0.431156	-1.55456	0.608646	-1.61593	-1.48329	high	low	low	Group6
LK167	0.583674	0.679984	0.609405	0.211042	0.964319	0.536336	0.653925	0.662412	0.651259	-0.65687	1.1636	0.498468	-0.312458	0.713963	0.617137	0.632341	-0.0311716	-0.518957	0.253365	0.299991	0.174837	high	high	high	Group7
LK168	0.622388	0.669466	0.611912	0.242862	0.984037	0.512181	0.617254	0.673266	0.673713	0.441875	0.789644	0.521449	-0.0709254	1.21443	0.0756419	-0.117872	0.347381	-0.1645	0.615759	0.554986	0.0351627	high	high	low	Group8
LK175	0.548502	0.680261	0.489351	0.117945	0.95052	0.515721	0.587765	0.649197	0.674142	-1.65512	1.17342	-0.602018	-1.01912	0.363711	0.154987	-0.721165	-0.492077	-0.157732	-0.240847	-0.419141	-0.303997	low	low	low	Group2
LK176	0.562652	0.703596	0.502579	0.23586	0.895896	0.53194	0.63237	0.682869	0.671495	-1.25352	2.00306	-0.48076	-0.124074	-1.02271	0.518575	0.191367	0.682343	-0.199507	0.37477	-0.542515	0.298194	high	low	high	Group5
LK180	0.598755	0.670806	0.551569	0.280357	0.925957	0.513525	0.726634	0.713676	0.807826	-0.228839	0.837286	-0.0316879	0.213677	-0.259727	0.10576	2.11982	1.75684	1.95262	0.304224	-0.0259125	1.48376	high	low	high	Group5
LK182	0.557726	0.672821	0.64044	0.283176	0.974493	0.509614	0.625245	0.670553	0.688806	-1.39331	0.908938	0.782949	0.235078	0.972178	0.0181065	0.0455907	0.252771	0.0737592	-0.242188	0.663402	0.097557	low	high	low	Group4
LK184	0.555969	0.651394	0.636933	0.2707	0.989114	0.54429	0.68487	0.709555	0.786529	-1.44319	0.147128	0.750809	0.140382	1.34327	0.795435	1.26541	1.6131	1.61644	-0.64803	0.744822	1.3226	low	high	high	Group3
MIE1	0.563656	0.665823	0.603796	0.258783	0.969652	0.532987	0.56845	0.647845	0.631664	-1.22502	0.660143	0.447051	0.0499231	0.849308	0.542057	-1.11632	-0.539261	-0.828288	-0.282439	0.448761	-0.485452	low	high	low	Group4
MIE2	0.628725	0.661753	0.402232	0.18805	0.867224	0.473513	0.554402	0.614124	0.565668	0.621752	0.515415	-1.4006	-0.486979	-1.75043	-0.791177	-1.4037	-1.71537	-1.8701	0.568583	-1.21267	-1.44509	high	low	low	Group6
MIE3	0.63475	0.7086	0.501614	0.124361	0.928738	0.532676	0.675561	0.694248	0.707799	0.792737	2.18096	-0.489602	-0.970417	-0.189128	0.535088	1.07498	1.0792	0.373596	1.48685	-0.549715	0.765715	high	low	high	Group5
Mchu1	0.592183	0.68022	0.538884	0.383533	0.945759	0.567478	0.632908	0.70215	0.701549	-0.415363	1.17198	-0.147971	0.996845	0.242877	1.31525	0.202377	1.3548	0.27492	0.378311	0.363917	0.786838	high	high	high	Group7
Mchu2	0.61954	0.693336	0.456612	0.209523	0.960935	0.555173	0.551042	0.653711	0.620723	0.361055	1.63829	-0.902117	-0.32399	0.628072	1.0394	-1.47245	-0.334635	-1.001	0.999672	-0.199345	-0.442173	high	low	low	Group6
Mchu3	0.609601	0.66143	0.656632	0.545642	0.962128	0.548183	0.638527	0.681537	0.689303	0.0789788	0.50394	0.931379	2.22735	0.658344	0.882698	0.317315	0.635883	0.0816135	0.291459	1.27236	0.479377	high	high	high	Group7
Mchu4	0.565883	0.624569	0.593879	0.256453	0.916615	0.576513	0.646342	0.656199	0.703789	-1.16181	-0.806533	0.356147	0.032238	-0.496833	1.51778	0.477197	-0.247865	0.310282	-0.984173	-0.0361493	0.51435	low	low	high	Group1
JMU1	0.578208	0.621005	0.50676	0.280654	0.955424	0.485384	0.559822	0.625067	0.628926	-0.812	-0.933244	-0.44243	0.215932	0.4882	-0.525061	-1.29282	-1.33369	-0.871509	-0.872622	0.0872341	-1.00577	low	high	low	Group4

## Sheet: Suppl Table S3
Supplementary Table 3. Clinicopthological features in 8 groups
Characteristic	G1, N = 11	G2, N = 13	G3, N = 17	G4, N = 16	G5, N = 12	G6, N = 21	G7, N = 16	G8, N = 7	p-value1
Age	75 (66, 80)	70 (62, 79)	72 (68, 75)	69 (66, 72)	76 (72, 82)	70 (62, 74)	72 (61, 74)	71 (57, 78)	0.16
Sex									0.73
female	5 (45%)	5 (38%)	6 (35%)	8 (50%)	2 (17%)	7 (33%)	5 (31%)	3 (43%)
male	6 (55%)	8 (62%)	11 (65%)	8 (50%)	10 (83%)	14 (67%)	11 (69%)	4 (57%)
Smoking Index (pack-year)	70 (0, 790)	0 (0, 720)	840 (220, 960)	540 (75, 772)	850 (550, 1,030)	880 (360, 1,040)	650 (208, 915)	400 (200, 905)	0.18
Histology									0.18
Adenocarcinoma	9 (82%)	11 (85%)	12 (71%)	15 (94%)	8 (67%)	8 (38%)	8 (50%)	5 (71%)
LCNEC	0 (0%)	0 (0%)	1 (5.9%)	1 (6.2%)	0 (0%)	3 (14%)	2 (12%)	0 (0%)
Others	1 (9.1%)	1 (7.7%)	0 (0%)	0 (0%)	2 (17%)	2 (9.5%)	1 (6.2%)	0 (0%)
Squamous cell carcinoma	1 (9.1%)	1 (7.7%)	4 (24%)	0 (0%)	2 (17%)	8 (38%)	5 (31%)	2 (29%)
Histological grade									0.21
1	1 (11%)	2 (17%)	1 (6.2%)	1 (6.7%)	0 (0%)	1 (5.3%)	1 (6.2%)	0 (0%)
2	7 (78%)	9 (75%)	11 (69%)	10 (67%)	4 (36%)	7 (37%)	5 (31%)	2 (40%)
3	1 (11%)	1 (8.3%)	3 (19%)	3 (20%)	5 (45%)	6 (32%)	7 (44%)	3 (60%)
4	0 (0%)	0 (0%)	1 (6.2%)	1 (6.7%)	2 (18%)	5 (26%)	3 (19%)	0 (0%)
Unknown	2	1	1	1	1	2	0	2
Invasive tumor size	21 (16, 26)	19 (17, 32)	28 (17, 35)	20 (14, 27)	35 (28, 43)	27 (23, 31)	28 (20, 44)	28 (20, 36)	0.026
T factor									0.1
1	9 (82%)	8 (62%)	3 (18%)	9 (56%)	3 (25%)	11 (52%)	6 (38%)	3 (43%)
2	1 (9.1%)	5 (38%)	13 (76%)	5 (31%)	6 (50%)	9 (43%)	8 (50%)	4 (57%)
3	1 (9.1%)	0 (0%)	1 (5.9%)	2 (12%)	1 (8.3%)	0 (0%)	1 (6.2%)	0 (0%)
4	0 (0%)	0 (0%)	0 (0%)	0 (0%)	2 (17%)	1 (4.8%)	1 (6.2%)	0 (0%)
N factor									0.45
0	6 (55%)	11 (85%)	13 (76%)	15 (94%)	7 (58%)	12 (57%)	11 (69%)	6 (86%)
1	3 (27%)	1 (7.7%)	1 (5.9%)	0 (0%)	2 (17%)	5 (24%)	2 (12%)	0 (0%)
2	1 (9.1%)	0 (0%)	3 (18%)	0 (0%)	3 (25%)	3 (14%)	3 (19%)	1 (14%)
X	1 (9.1%)	1 (7.7%)	0 (0%)	1 (6.2%)	0 (0%)	1 (4.8%)	0 (0%)	0 (0%)
M factor									0.73
0	11 (100%)	13 (100%)	17 (100%)	16 (100%)	11 (91.7%)	20 (95.2%)	15 (93.8%)	7 (100%)
1	0 (0%)	0 (0%)	0 (0%)	0 (0%)	1 (8.3%)	1 (4.8%)	1 (6.2%)	0 (0%)
Pathological Stage									0.27
I	6 (55%)	11 (85%)	13 (76%)	14 (88%)	5 (42%)	10 (48%)	7 (44%)	5 (71%)
II	4 (36%)	2 (15%)	0 (0%)	2 (12%)	3 (25%)	6 (29%)	5 (31%)	1 (14%)
III	1 (9.1%)	0 (0%)	4 (24%)	0 (0%)	3 (25%)	4 (19%)	3 (19%)	1 (14%)
IV	0 (0%)	0 (0%)	0 (0%)	0 (0%)	1 (8.3%)	1 (4.8%)	1 (6.2%)	0 (0%)
SNV	22 (15, 42)	37 (29, 64)	15 (6, 42)	65 (44, 118)	118 (86, 236)	170 (60, 248)	56 (26, 127)	66 (50, 134)	<0.001
1Kruskal-Wallis rank sum test; Fisher's exact test
LCNEC, large cell neuroendcrine carcinoma; SNV, single nucleotide variant

## Sheet: Suppl Table S4
Supplementary Table S4. Clinicopathological features of 990 lung cancer patients from TCGA cohort
Characteristic	N = 990
Age	67 (60, 73)
Unknown	15
Sex
female	397 (40%)
male	593 (60%)
Smoking index	40 (30, 60)
Unknown	233
Histology
Adenoccarcinoma	499 (50%)
Squamous cell carcinoma	490 (50%)
Unknown	1
Pathological Stage
I	510 (52%)
II	280 (28%)
III	162 (16%)
IV	32 (3.3%)
Unknown	6
	Median (IQR); n (%)
IQR, interquartile range
